# Supplementary material for: Bio-inspired catechol chemistry: a new way to develop a re-moldable and injectable coacervate hydrogel
Source: Royal Society of Chemistry journal article supplement (doi:10.1039/c2cc36843a), 2012-01-01
Supplement: c2cc36843a.pdf [file c2cc36843a.pdf]

## *Supplementary Information*

### **Bio-inspired catechol chemistry: A new way to develop re-modulable and injectable coacervate hydrogel**

**Yeon Jeong Oh<sup>a</sup>, Il Hwan Cho<sup>b</sup>, Haeshin Lee<sup>c</sup>, Ki-Jung Park<sup>d</sup>, Hyukjin Lee<sup>e\*</sup> and Sung Young Park<sup>a,\*</sup>**

<sup>a</sup> *Department of Chemical & Biological Engineering Korea National University of Transportation Chungju-Si 380-702, Republic of Korea E-mail: parkchem@ut.ac.kr Fax: +82-(0)43-841-5220; Tel: +82-(0)43-841-5225*

<sup>b</sup> *Central Research Institute Shinpoong Pharm. Co., Ltd. Ansan-Si 434-4, Republic of Korea*

<sup>c</sup> *Department of Chemistry, KAIST, Daejeon 305-70, Republic of Korea*

<sup>d</sup> *Korea Food & Drug Administration Cheongwon-gun 363-700, Republic of Korea*

<sup>e</sup> *College of Pharmacy, Ewha Womans University, Seoul 120-750, Republic of Korea, E-mail: hyukjin@ewha.ac.kr Fax: +82-(0)2-3277-3007; Tel: +82-(0)2-3277-3026*

## Table of content

|                                 |    |
|---------------------------------|----|
| 1) Experimental Section         | S3 |
| 2) UV-characterization          | S4 |
| 3) Elemental analysis by XPS    | S5 |
| 4) Rheological characterization | S6 |
| 5) References                   | S7 |

## Experimental Section

**Materials:** Hyaluronic acid (MW 230 kDa) was purchased from LifeCore (Chaska, USA). Dopamine hydrochloride (DN), 1-ethyl-3-(3-dimethylaminopropyl)-carbodiimide hydrochloride (EDC), chitosan (MW 5kDa), sodium cyanoborohydride ( $\text{NaBH}_3\text{CN}$ ), lactose, acetic acid, methanol were purchased from Sigma-Aldrich (Minnesota, USA). N-hydroxysuccinimide (NHS) was purchased from Merck (Germany).

**Synthesis of HA-DN and Chitlac:** Dopamine conjugated HA (HA) was synthesized according to previous report with slight modification.<sup>1-3</sup> Degrees of substitution (DS) were determined using  $^1\text{H-NMR}$  spectroscopy (Bruker AVANCE 400). The degree of dopamine substitution for HA-DN was 1.65%, and the synthesis of Chitlac (lactose modified chitosan) was performed according to a procedure reported elsewhere.<sup>4-6</sup>

**Complex Coacervate Hydrogels:** The complex coacervate formation of binary polymer procedure (3 wt%, chitlac/HA-DN weight ratio of 4:6) was followed by different buffer conditions (Method A: chitlac/HA at pH 8.5, Method B: chitlac/HA-DN at pH 4, Method C: Chitlac/HA-DN at pH 8.5 and pH 7.4, respectively, Method D: chitlac/HA-DN at pH 10, and Method E: chitlac/HA-DN at pH 8.5). The solutions were incubated at 25°C for 12h

**Rheological Studies:** Rheological properties of various hydrogels were monitored using a rotating rheometer (TA Instruments, AR 1500ex) equipped with a temperature controller. The contribution of a solid-like behavior (storage modulus ( $G'$ )) and a liquid-like behavior (loss modulus ( $G''$ )) were recorded with changing temperature using a parallel plate (20 mm). Frequency was optimized to 0.1 Hz as determined using a frequency sweep at 25°C.

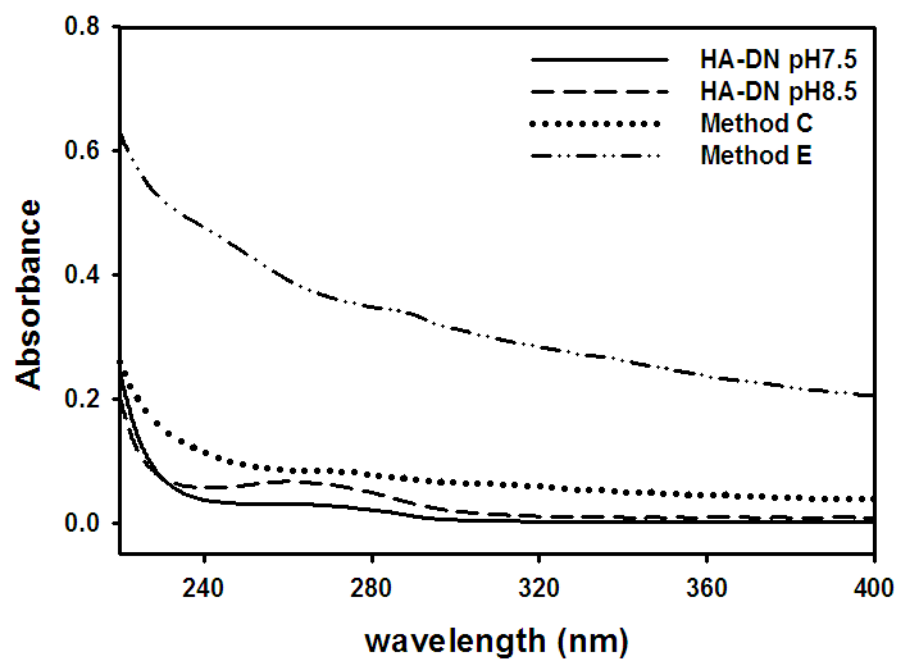

**Fig. S1.** UV-vis absorbance spectra of HA-DN at pH 7.5 and at pH 8.5, complex coacervate formation following method C and method E. (in all methods, concentration was 0.1 wt% at 25<sup>0</sup>C).

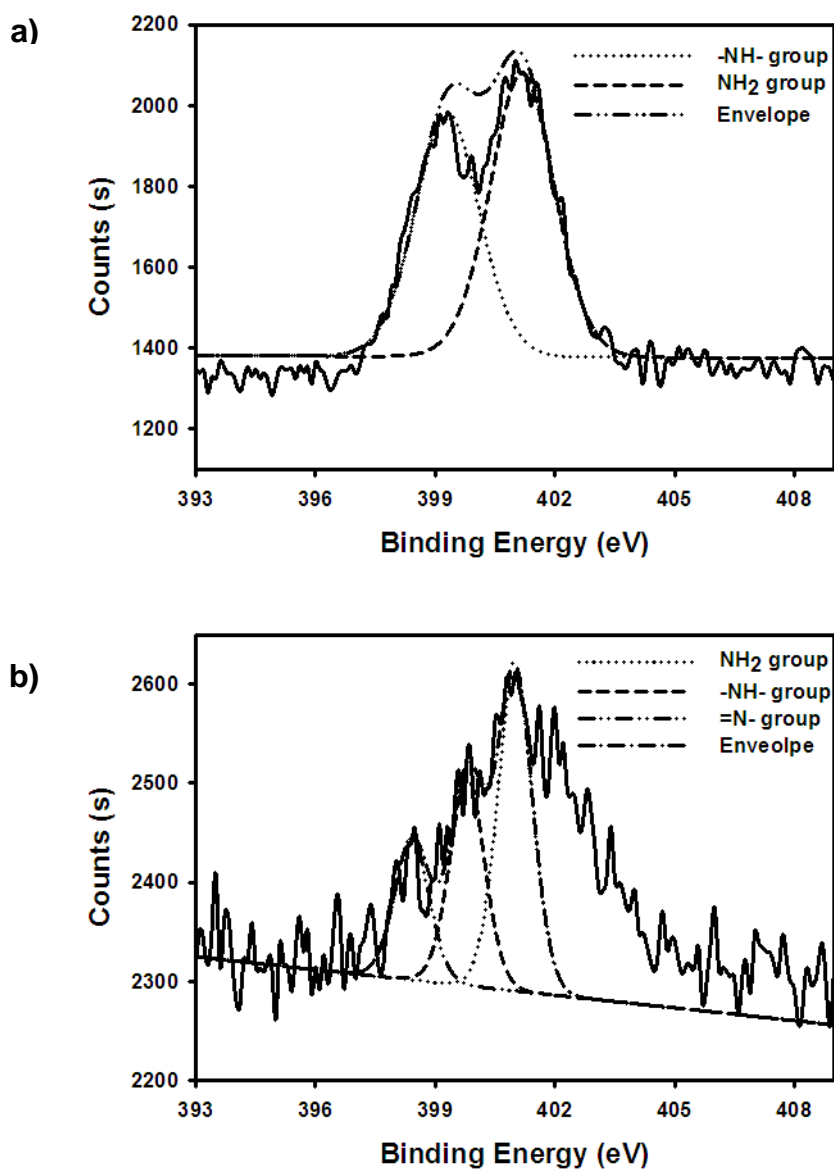

**Fig. S2.** Elemental analysis by XPS measurement of coacervate hydrogels: a) Chitlac/HA-DN coacervate hydrogels by Method C, b) non-coacervate mixture of Chitlac/HA-DN by Method E.

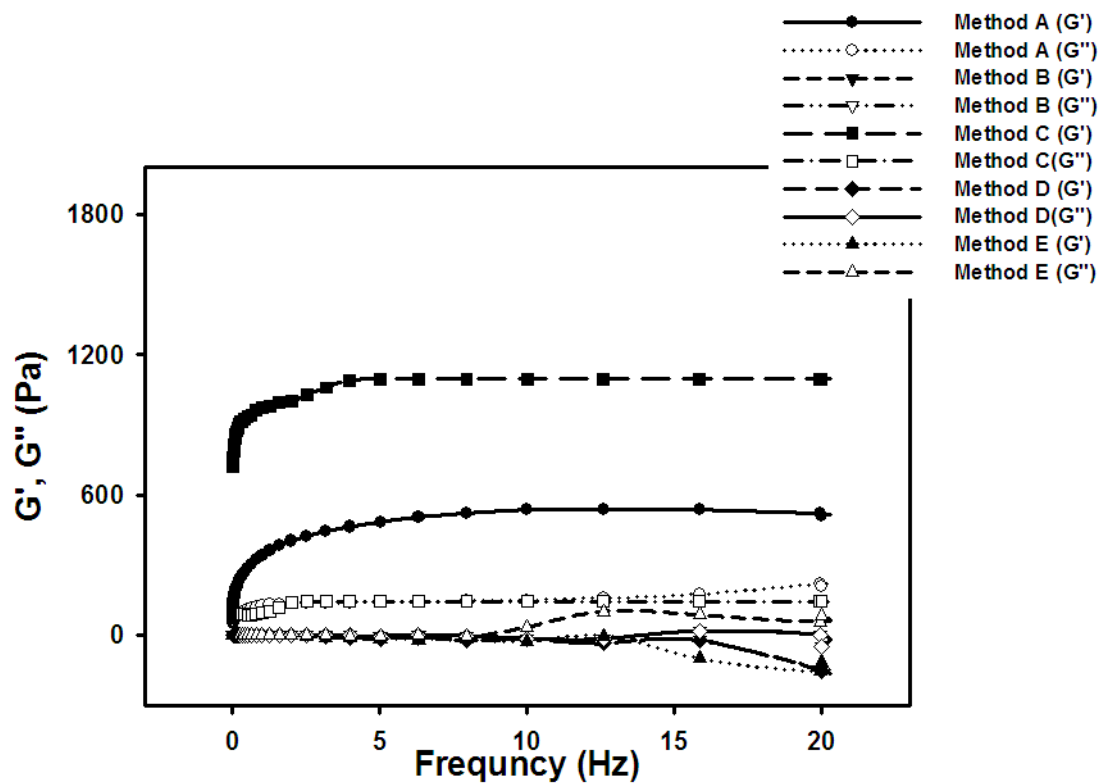

**Fig. S3.** Rheological characterization of bio-inspired coacervate hydrogels comparison of  $G'$  (storage modulus) vs.  $G''$  (loss modulus) at different Frequency sweep between 0.1 to 20 Hz condition method A, B, C, D and E.

## References

1. Y. Lee, H. J. Chung, S. Yeo, C-H Ahn, H. Lee, P. B. Messersmith and T. G. Park, *Soft Matter* 2010, **6**, 977.
2. Y. Lee, H. Lee, Y. B. Kim, J. Kim, T. Hyeon, H. W. Park, P. B. Messersmith and T. G. Park, *Adv. Mater.* 2008, **20**, 4154.
3. T. G. Kim, Y. Lee and T. G. Park, *Int. J. Pharm.* 2010, **384**, 181.
4. I. Donatia, S. Stredanskaa, G. Silvestrinib, A. Veterea, P. Marcona, E. Marsicha, P. Mozetica, A. Gaminia, S. Paolettia and F. Vittura, *Biomaterials* 2005, **26**, 987.
5. I. Donati, M. Borgogna, E. Turello, A. Cesaro and S. Paoletti, *Biomacromolecules* 2007, **8**, 1471.
6. M. Yalani and L. D. Hall, *Macromolecules* 1984, **17**, 272.
